# Supplementary material for: (NH4)6[Mn3B6P9O36(OH)3]·4H2O: A new open-framework manganese borophosphate synthesized by using boric acid flux method
Source: Royal Society of Chemistry journal article supplement (doi:10.1039/c0dt01475c), 2011-01-01
Supplement: c0dt01475c.pdf [file c0dt01475c.pdf]

## Supporting Information

# $(\text{NH}_4)_6[\text{Mn}_3\text{B}_6\text{P}_9\text{O}_{36}(\text{OH})_3]\cdot 4\text{H}_2\text{O}$ : A New Open-Framework Manganese Borophosphate Synthesized by Using Boric Acid Flux Method

Weiting Yang, Jiyang Li, Tianyi Na, Jin Xu, Lei Wang, Jihong Yu\* and Ruren Xu

State Key Laboratory of Inorganic Synthesis and Preparative Chemistry, College of Chemistry,  
Jilin University, Changchun 130012, P. R. China

E-mail: [jihong@jlu.edu.cn](mailto:jihong@jlu.edu.cn)

Table S1 Selected Bond Lengths [ $\text{\AA}$ ] and Angles [deg] for MnBPO-CJ31<sup>a</sup>

|             |          |                    |            |
|-------------|----------|--------------------|------------|
| Mn(1)-O(8)  | 2.104(4) | O(18)-Mn(3)-O(27)  | 99.05(19)  |
| Mn(1)-O(6)  | 2.117(4) | O(18)-Mn(3)-O(19)  | 90.42(18)  |
| Mn(1)-O(5)  | 2.137(4) | O(27)-Mn(3)-O(19)  | 88.84(17)  |
| Mn(1)-O(3)  | 2.151(4) | O(18)-Mn(3)-O(21)  | 89.82(18)  |
| Mn(1)-O(12) | 2.213(4) | O(27)-Mn(3)-O(21)  | 93.12(19)  |
| Mn(1)-O(13) | 2.417(4) | O(19)-Mn(3)-O(21)  | 177.96(19) |
| Mn(2)-O(38) | 2.142(4) | O(18)-Mn(3)-O(16)  | 97.35(19)  |
| Mn(2)-O(34) | 2.146(4) | O(27)-Mn(3)-O(16)  | 163.56(16) |
| Mn(2)-O(23) | 2.165(4) | O(19)-Mn(3)-O(16)  | 92.10(16)  |
| Mn(2)-O(37) | 2.202(4) | O(21)-Mn(3)-O(16)  | 85.86(18)  |
| Mn(2)-O(31) | 2.231(4) | O(18)-Mn(3)-O(20)  | 177.89(18) |
| Mn(2)-O(39) | 2.297(4) | O(27)-Mn(3)-O(20)  | 81.48(15)  |
| Mn(3)-O(18) | 2.079(5) | O(19)-Mn(3)-O(20)  | 91.63(15)  |
| Mn(3)-O(27) | 2.147(4) | O(21)-Mn(3)-O(20)  | 88.11(15)  |
| Mn(3)-O(19) | 2.151(4) | O(16)-Mn(3)-O(20)  | 82.09(14)  |
| Mn(3)-O(21) | 2.174(5) | O(8)#1-P(1)-O(8)   | 113.9(3)   |
| Mn(3)-O(16) | 2.182(4) | O(8)#1-P(1)-O(9)   | 106.1(2)   |
| Mn(3)-O(20) | 2.290(4) | O(8)-P(1)-O(9)     | 112.3(2)   |
| P(1)-O(8)#1 | 1.517(4) | O(8)#1-P(1)-O(9)#1 | 112.3(2)   |
| P(1)-O(8)   | 1.517(4) | O(8)-P(1)-O(9)#1   | 106.1(2)   |
| P(1)-O(9)   | 1.564(4) | O(9)-P(1)-O(9)#1   | 106.0(3)   |
| P(1)-O(9)#1 | 1.564(4) | O(38)-P(2)-O(12)   | 115.0(2)   |
| P(2)-O(38)  | 1.512(4) | O(38)-P(2)-O(11)   | 109.9(2)   |
| P(2)-O(12)  | 1.516(4) | O(12)-P(2)-O(11)   | 110.7(2)   |
| P(2)-O(11)  | 1.570(4) | O(38)-P(2)-O(10)   | 107.1(2)   |
| P(2)-O(10)  | 1.591(4) | O(12)-P(2)-O(10)   | 109.7(2)   |
| P(3)-O(6)   | 1.513(4) | O(11)-P(2)-O(10)   | 103.8(2)   |
| P(3)-O(6)#2 | 1.513(4) | O(6)-P(3)-O(6)#2   | 113.0(4)   |
| P(3)-O(7)#2 | 1.568(4) | O(6)-P(3)-O(7)#2   | 110.8(2)   |
| P(3)-O(7)   | 1.568(4) | O(6)#2-P(3)-O(7)#2 | 106.9(2)   |
| P(4)-O(16)  | 1.501(4) | O(6)-P(3)-O(7)     | 106.9(2)   |
| P(4)-O(15)  | 1.552(4) | O(6)#2-P(3)-O(7)   | 110.8(2)   |
| P(4)-O(14)  | 1.563(4) | O(7)#2-P(3)-O(7)   | 108.3(3)   |
| P(4)-O(17)  | 1.572(4) | O(16)-P(4)-O(15)   | 110.8(2)   |
| P(5)-O(31)  | 1.490(4) | O(16)-P(4)-O(14)   | 110.8(2)   |
| P(5)-O(26)  | 1.547(4) | O(15)-P(4)-O(14)   | 105.7(2)   |
| P(5)-O(30)  | 1.555(4) | O(16)-P(4)-O(17)   | 114.0(2)   |
| P(5)-O(25)  | 1.562(4) | O(15)-P(4)-O(17)   | 107.5(2)   |
| P(6)-O(21)  | 1.494(4) | O(14)-P(4)-O(17)   | 107.6(2)   |
| P(6)-O(23)  | 1.510(4) | O(31)-P(5)-O(26)   | 110.8(2)   |

---

|               |          |                     |          |
|---------------|----------|---------------------|----------|
| P(6)-O(24)    | 1.568(5) | O(31)-P(5)-O(30)    | 113.0(2) |
| P(6)-O(22)    | 1.568(4) | O(26)-P(5)-O(30)    | 106.3(2) |
| P(7)-O(19)#3  | 1.514(4) | O(31)-P(5)-O(25)    | 112.2(2) |
| P(7)-O(34)    | 1.519(4) | O(26)-P(5)-O(25)    | 105.9(2) |
| P(7)-O(33)    | 1.558(4) | O(30)-P(5)-O(25)    | 108.3(2) |
| P(7)-O(32)    | 1.581(4) | O(21)-P(6)-O(23)    | 113.9(3) |
| P(8)-O(3)     | 1.492(4) | O(21)-P(6)-O(24)    | 110.1(4) |
| P(8)-O(1)     | 1.546(4) | O(23)-P(6)-O(24)    | 110.7(2) |
| P(8)-O(2)     | 1.556(4) | O(21)-P(6)-O(22)    | 109.7(2) |
| P(8)-O(4)     | 1.567(4) | O(23)-P(6)-O(22)    | 107.2(2) |
| P(9)-O(5)#4   | 1.506(5) | O(24)-P(6)-O(22)    | 104.9(3) |
| P(9)-O(27)    | 1.506(4) | O(19)#3-P(7)-O(34)  | 114.6(2) |
| P(9)-O(29)    | 1.582(4) | O(19)#3-P(7)-O(33)  | 110.8(2) |
| P(9)-O(28)    | 1.602(5) | O(34)-P(7)-O(33)    | 108.9(2) |
| P(10)-O(18)#5 | 1.488(5) | O(19)#3-P(7)-O(32)  | 109.9(2) |
| P(10)-O(37)   | 1.498(5) | O(34)-P(7)-O(32)    | 109.4(2) |
| P(10)-O(36)   | 1.549(5) | O(33)-P(7)-O(32)    | 102.6(2) |
| P(10)-O(35)   | 1.596(6) | O(3)-P(8)-O(1)      | 110.2(2) |
| B(1)-O(13)    | 1.452(7) | O(3)-P(8)-O(2)      | 112.0(3) |
| B(1)-O(9)     | 1.459(7) | O(1)-P(8)-O(2)      | 108.3(2) |
| B(1)-O(10)    | 1.487(7) | O(3)-P(8)-O(4)      | 113.7(3) |
| B(1)-O(14)#1  | 1.518(7) | O(1)-P(8)-O(4)      | 105.2(2) |
| B(2)-O(7)#2   | 1.448(7) | O(2)-P(8)-O(4)      | 107.0(2) |
| B(2)-O(13)    | 1.460(6) | O(5)#4-P(9)-O(27)   | 116.6(3) |
| B(2)-O(15)#1  | 1.501(7) | O(5)#4-P(9)-O(29)   | 106.5(2) |
| B(2)-O(11)    | 1.511(7) | O(27)-P(9)-O(29)    | 111.6(2) |
| B(3)-O(20)#3  | 1.451(7) | O(5)#4-P(9)-O(28)   | 107.0(3) |
| B(3)-O(29)#3  | 1.476(7) | O(27)-P(9)-O(28)    | 108.3(3) |
| B(3)-O(33)    | 1.494(7) | O(29)-P(9)-O(28)    | 106.3(2) |
| B(3)-O(26)#6  | 1.496(6) | O(18)#5-P(10)-O(37) | 117.3(3) |
| B(4)-O(39)    | 1.450(7) | O(18)#5-P(10)-O(36) | 105.2(3) |
| B(4)-O(32)    | 1.479(7) | O(37)-P(10)-O(36)   | 111.8(3) |
| B(4)-O(2)#7   | 1.492(7) | O(18)#5-P(10)-O(35) | 106.7(3) |
| B(4)-O(30)    | 1.496(7) | O(37)-P(10)-O(35)   | 108.7(3) |
| B(5)-O(36)    | 1.439(8) | O(36)-P(10)-O(35)   | 106.6(4) |
| B(5)-O(39)    | 1.441(7) | O(13)-B(1)-O(9)     | 112.3(4) |
| B(5)-O(1)#7   | 1.467(7) | O(13)-B(1)-O(10)    | 111.0(4) |
| B(5)-O(24)    | 1.469(8) | O(9)-B(1)-O(10)     | 110.6(4) |
| B(6)-O(20)    | 1.429(7) | O(13)-B(1)-O(14)#1  | 110.3(4) |
| B(6)-O(22)    | 1.467(7) | O(9)-B(1)-O(14)#1   | 105.4(4) |
| B(6)-O(25)#5  | 1.480(7) | O(10)-B(1)-O(14)#1  | 106.9(4) |
| B(6)-O(17)    | 1.496(7) | O(7)#2-B(2)-O(13)   | 111.0(4) |

---

---

|                   |            |                      |          |
|-------------------|------------|----------------------|----------|
| O(8)-Mn(1)-O(6)   | 176.13(18) | O(7)#2-B(2)-O(15)#1  | 104.9(4) |
| O(8)-Mn(1)-O(5)   | 91.11(17)  | O(13)-B(2)-O(15)#1   | 110.3(4) |
| O(6)-Mn(1)-O(5)   | 88.29(17)  | O(7)#2-B(2)-O(11)    | 113.8(4) |
| O(8)-Mn(1)-O(3)   | 91.07(17)  | O(13)-B(2)-O(11)     | 108.4(4) |
| O(6)-Mn(1)-O(3)   | 92.70(18)  | O(15)#1-B(2)-O(11)   | 108.4(4) |
| O(5)-Mn(1)-O(3)   | 85.47(17)  | O(20)#3-B(3)-O(29)#3 | 109.8(4) |
| O(8)-Mn(1)-O(12)  | 88.73(16)  | O(20)#3-B(3)-O(33)   | 113.1(4) |
| O(6)-Mn(1)-O(12)  | 88.01(17)  | O(29)#3-B(3)-O(33)   | 109.6(4) |
| O(5)-Mn(1)-O(12)  | 113.57(16) | O(20)#3-B(3)-O(26)#6 | 113.0(4) |
| O(3)-Mn(1)-O(12)  | 160.96(16) | O(29)#3-B(3)-O(26)#6 | 108.0(4) |
| O(8)-Mn(1)-O(13)  | 86.54(14)  | O(33)-B(3)-O(26)#6   | 103.0(4) |
| O(6)-Mn(1)-O(13)  | 94.85(15)  | O(39)-B(4)-O(32)     | 114.0(4) |
| O(5)-Mn(1)-O(13)  | 167.59(15) | O(39)-B(4)-O(2)#7    | 112.6(4) |
| O(3)-Mn(1)-O(13)  | 82.40(15)  | O(32)-B(4)-O(2)#7    | 102.6(4) |
| O(12)-Mn(1)-O(13) | 78.59(14)  | O(39)-B(4)-O(30)     | 110.9(4) |
| O(38)-Mn(2)-O(34) | 88.16(16)  | O(32)-B(4)-O(30)     | 106.9(4) |
| O(38)-Mn(2)-O(23) | 94.93(16)  | O(2)#7-B(4)-O(30)    | 109.4(4) |
| O(34)-Mn(2)-O(23) | 175.95(16) | O(36)-B(5)-O(39)     | 112.1(5) |
| O(38)-Mn(2)-O(37) | 101.75(16) | O(36)-B(5)-O(1)#7    | 106.2(5) |
| O(34)-Mn(2)-O(37) | 88.86(17)  | O(39)-B(5)-O(1)#7    | 113.1(4) |
| O(23)-Mn(2)-O(37) | 87.96(17)  | O(36)-B(5)-O(24)     | 109.5(6) |
| O(38)-Mn(2)-O(31) | 97.00(16)  | O(39)-B(5)-O(24)     | 112.6(5) |
| O(34)-Mn(2)-O(31) | 94.20(16)  | O(1)#7-B(5)-O(24)    | 102.8(5) |
| O(23)-Mn(2)-O(31) | 88.03(16)  | O(20)-B(6)-O(22)     | 114.4(4) |
| O(37)-Mn(2)-O(31) | 161.10(16) | O(20)-B(6)-O(25)#5   | 112.2(4) |
| O(38)-Mn(2)-O(39) | 174.72(15) | O(22)-B(6)-O(25)#5   | 103.6(4) |
| O(34)-Mn(2)-O(39) | 90.92(14)  | O(20)-B(6)-O(17)     | 110.0(4) |
| O(23)-Mn(2)-O(39) | 86.24(14)  | O(22)-B(6)-O(17)     | 108.8(4) |
| O(37)-Mn(2)-O(39) | 83.43(15)  | O(25)#5-B(6)-O(17)   | 107.6(4) |
| O(31)-Mn(2)-O(39) | 77.88(15)  |                      |          |

---

<sup>a</sup>Symmetry transformations used to generate equivalent atoms: #1 -x+2, y, -z+1; #2 -x+2, y, -z; #3 x, y, z-1; #4 -x+3/2, y+1/2, -z+1; #5 -x+3/2, y-1/2, -z+1; #6 -x+3/2, y-1/2, -z; #7 x-1/2, y+1/2, z.

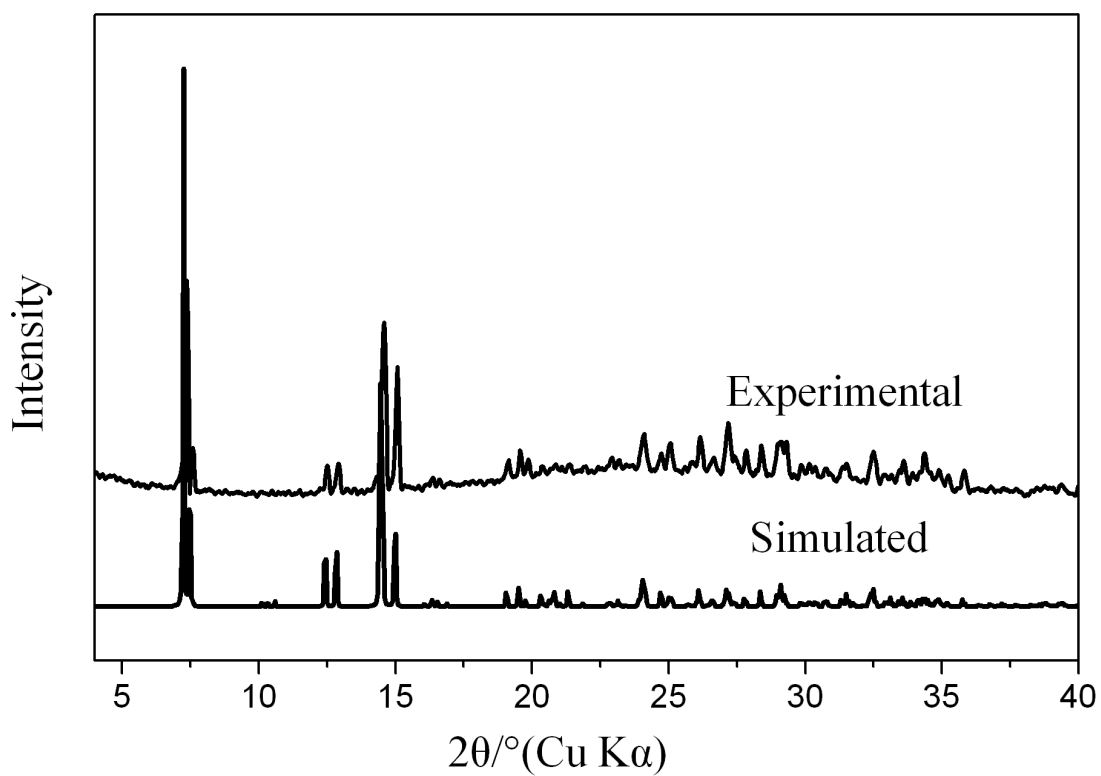

Figure S1 Simulated and experimental powder X-ray diffraction patterns of MnBPO-CJ31.

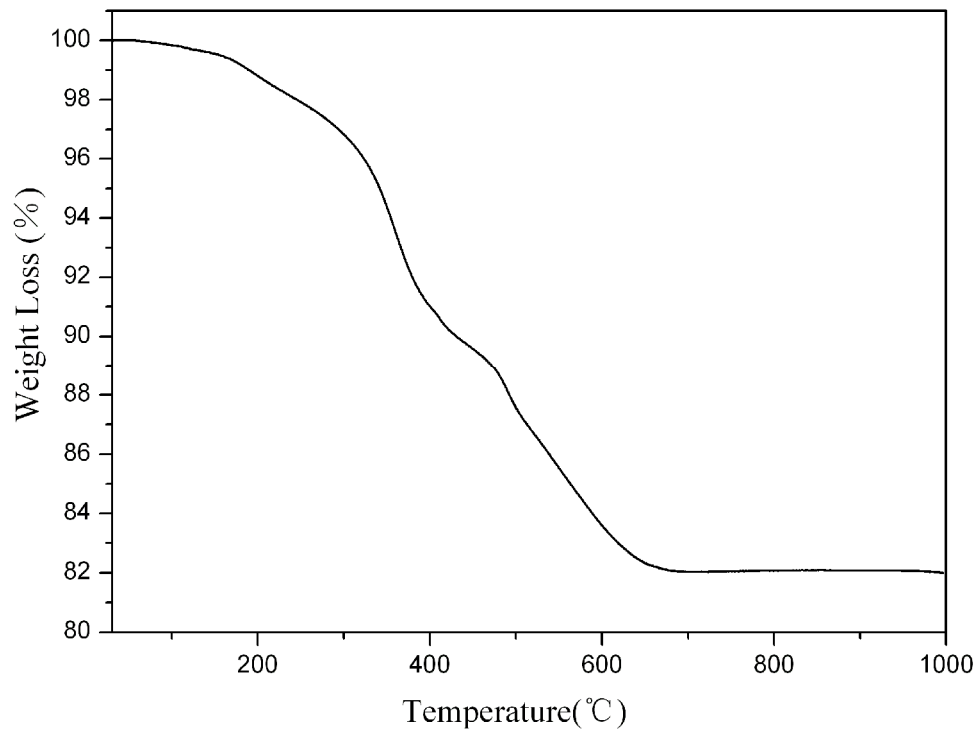

Figure S2 TG curve of MnBPO-CJ31.

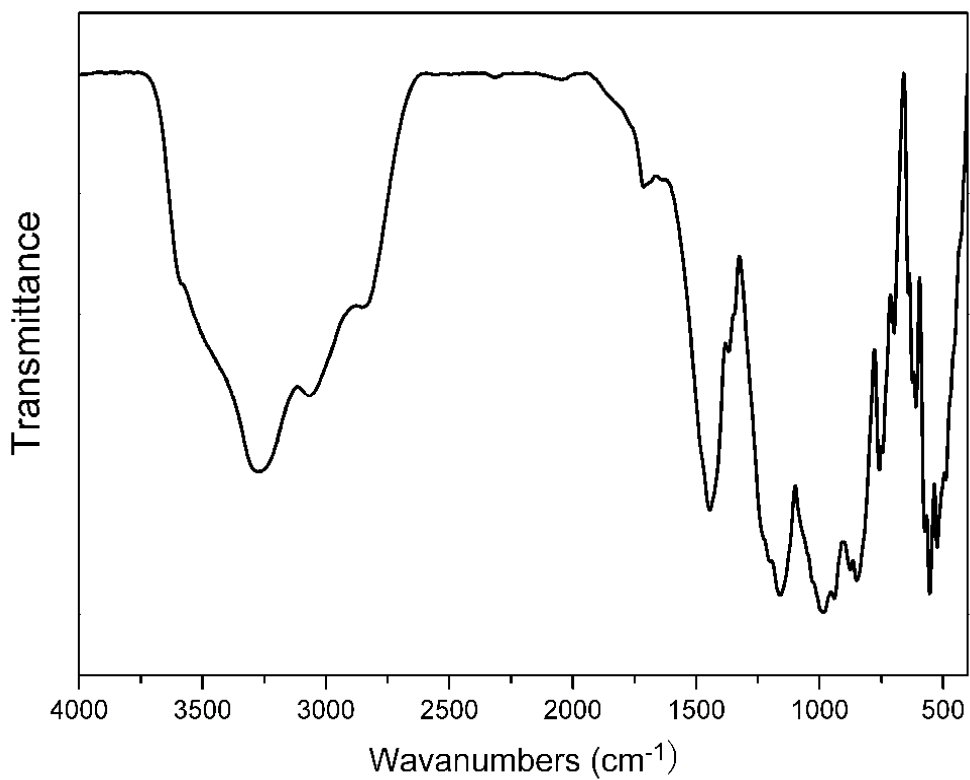

Figure S3 Infrared Spectrum of MnBPO-CJ31.

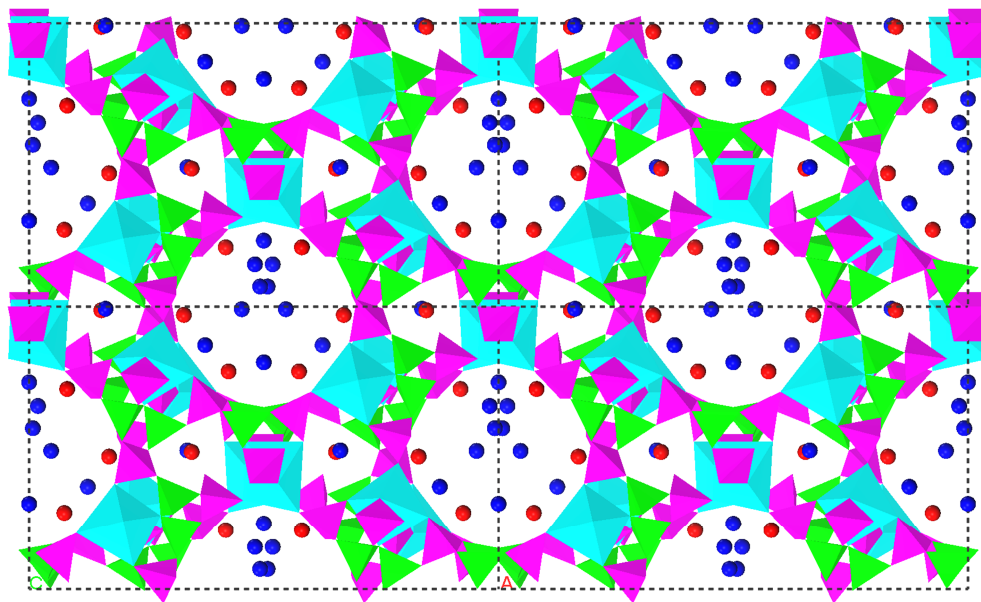

Fig. S4 The location of N ( $\text{NH}_4^+$ ) and Ow ( $\text{H}_2\text{O}$ ) in the framework of MnBPO-CJ31 along the [001] direction. Color code: Mn, bright blue; P, purple; B, green; N, blue sphere; Ow, red sphere.
